# Supplementary material for: Dissecting the psoriasis transcriptome: inflammatory- and cytokine-driven gene expression in lesions from 163 patients
Source: PubMed Central journal article supplement (PMC3751090; doi:10.1186/1471-2164-14-527), 2013-08-01

**(A)****Average Fold-Change (PP/PN)**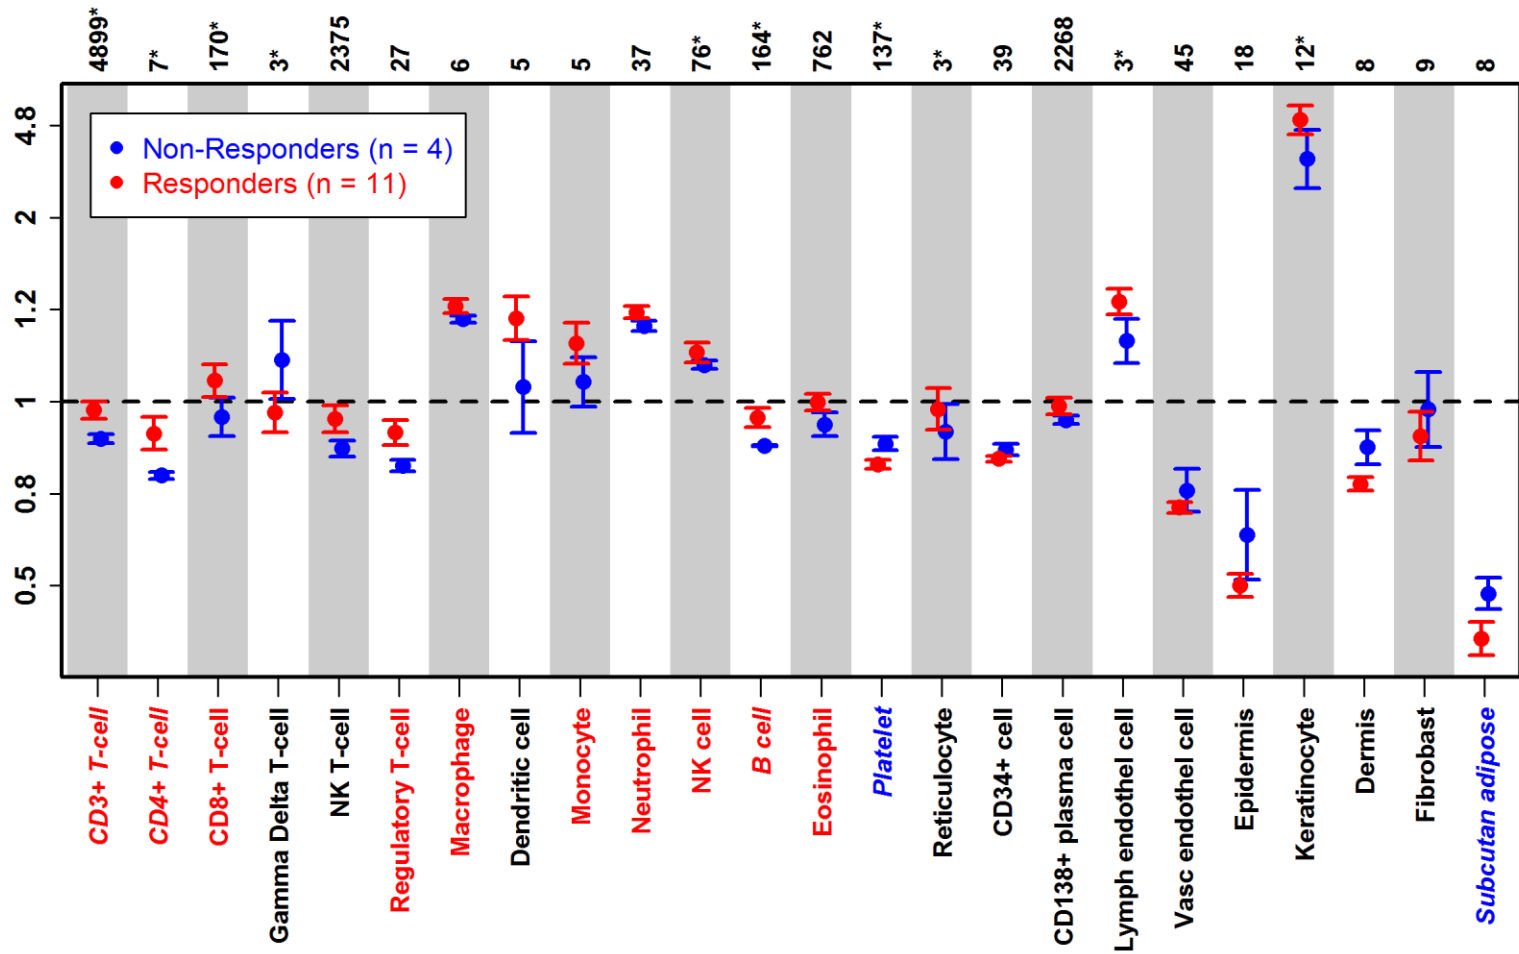

**(B)****Average Fold-Change (PP/PN)**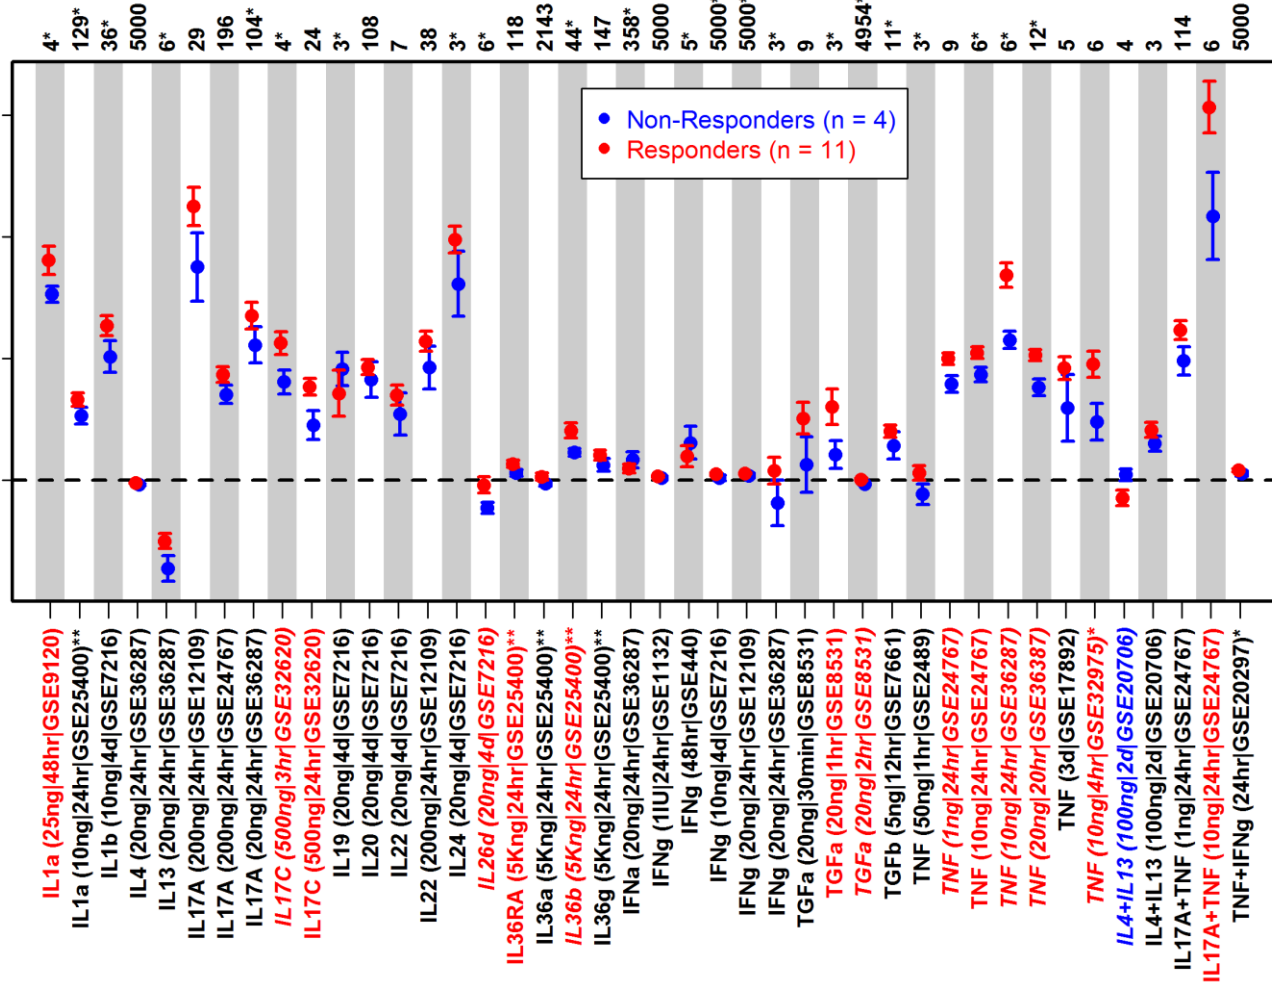

(C)

## Average Fold-Change (PP/PN)

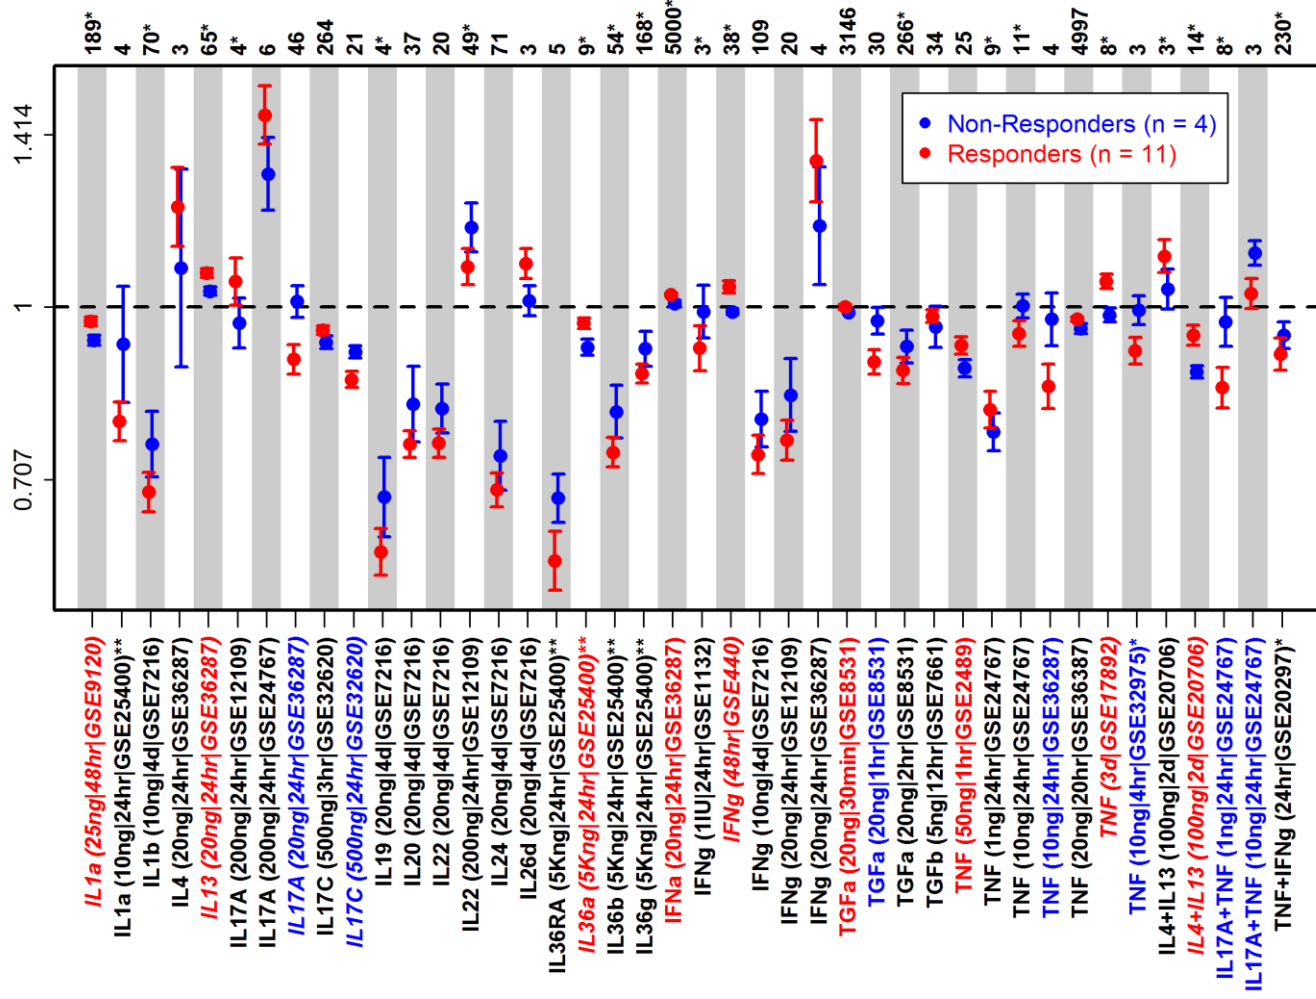

Supplement: 1471-2164-14-527-S11.pdf [file 1471-2164-14-527-S11.pdf]
